# Supplementary material
Source: HighWire-hosted journal article supplement (https://bmjopen.bmj.com/content/10/6/e036235)
Supplement: inline-supplementary-material-2 [file inline-supplementary-material-2.pdf]

Critical Care Research Group  
Nuffield Department of Clinical  
Neurosciences  
University of Oxford

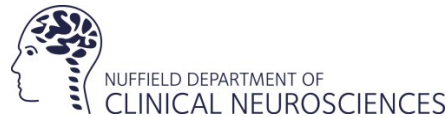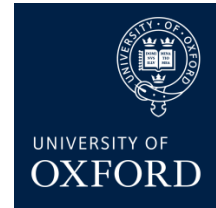

Lead investigator: Professor Peter Watkinson  
Peter.watkinson@ndcn.ox.ac.uk  
Primary researcher: Mirae Harford  
Oxford telephone number: 01865 231449  
Oxford e-mail: mirae.harford@ndcn.ox.ac.uk

### PARTICIPANT CONSENT FORM

CUREC Approval Reference: R63796/RE001

#### Mapping Of Lower Limb skin pErfusion (MOLLIE)

Purpose of Study: To investigate leg skin perfusion at rest and changes created to the perfusion pattern in response to phenylephrine and glyceryl trinitrate (GTN) infusions.

Please initial each  
box

- |   |                                                                                                                                                                                                                                                                                                                                     |                          |
|---|-------------------------------------------------------------------------------------------------------------------------------------------------------------------------------------------------------------------------------------------------------------------------------------------------------------------------------------|--------------------------|
| 1 | I confirm that I have read and understand the information sheet version 2.0 dated May 2019 for the above study. I have had the opportunity to consider the information carefully, ask questions and have had these questions answered satisfactorily.                                                                               | <input type="checkbox"/> |
| 2 | I understand that my participation is voluntary and that I am free to withdraw at any time, without giving any reason, and without any adverse consequences or academic penalty.                                                                                                                                                    | <input type="checkbox"/> |
| 3 | I have been advised about the potential risks associated with taking part in this research and have taken these into consideration before consenting to participate. I understand that the study visit involves video equipment and the recordings will be saved for subsequent analysis.                                           | <input type="checkbox"/> |
| 4 | I have been advised as to what I need to do for this research (especially with regard to the phenylephrine and GTN administration) and I agree to follow the instructions given to me. I understand that taking part will involve having a drip and application of a tourniquet on one leg which will stay inflated for one minute. | <input type="checkbox"/> |
| 5 | To the best of my knowledge, I do not meet any of the exclusion criteria outlined in the information sheet for this research. If this changes at a later date during study participation, I agree to notify the researchers immediately.                                                                                            | <input type="checkbox"/> |
| 6 | I understand that data collected during the study may be looked at by designated individuals from the University of Oxford. I give permission for these individuals to access my data.                                                                                                                                              | <input type="checkbox"/> |
| 8 | I understand who will have access to personal data provided, how the data will be stored and what will happen to the data at the end of the project.                                                                                                                                                                                | <input type="checkbox"/> |
| 9 | I agree for data collected in this study to be shared with other researchers, including those working outside of the EU, to be used in other research studies. I understand that any data shared will be fully anonymised so that I cannot be identified.                                                                           | <input type="checkbox"/> |

- |    |                                                                                                                                                                    |                          |
|----|--------------------------------------------------------------------------------------------------------------------------------------------------------------------|--------------------------|
| 10 | I understand how this research will be written up and published. I agree to the use of anonymised data (including videos) in research publications.                | <input type="checkbox"/> |
| 11 | I understand that this project has been reviewed by, and received ethics clearance through, the University of Oxford Central University Research Ethics Committee. | <input type="checkbox"/> |
| 12 | I understand how to raise a concern or make a complaint.                                                                                                           | <input type="checkbox"/> |
| 13 | I agree to take part in the study                                                                                                                                  | <input type="checkbox"/> |

|                     |                       |           |
|---------------------|-----------------------|-----------|
|                     | <i>dd / mm / yyyy</i> |           |
| Name of Participant | Date                  | Signature |

|                               |                       |           |
|-------------------------------|-----------------------|-----------|
|                               | <i>dd / mm / yyyy</i> |           |
| Name of person taking consent | Date                  | Signature |
